# Supplementary material for: EcoTILLING for the identification of allelic variants of melon eIF4E, a factor that controls virus susceptibility
Source: PubMed Central journal article supplement (PMC1914064; doi:10.1186/1471-2229-7-34), 2007-06-21
Supplement: 1471-2229-7-34-S1.pdf [file 1471-2229-7-34-S1.pdf]

**Additional file 1: *Cucumis* ssp. accessions analyzed by EcoTILLING.** Accession number, taxonomic denomination, geographical origin and results of CVYV and MNSV susceptibility analyses are given for all accessions characterized in this work.

| Accession number <sup>a</sup> | Species                    | Origin   | EcoTILLING haplotype | CVYV <sup>b</sup> | MNSV-Mα5             |                         | MNSV-264             |                         |
|-------------------------------|----------------------------|----------|----------------------|-------------------|----------------------|-------------------------|----------------------|-------------------------|
|                               |                            |          |                      |                   | Les/cot <sup>c</sup> | Sys. Symp. <sup>d</sup> | Les/cot <sup>e</sup> | Sys. Symp. <sup>f</sup> |
| C-001                         | <i>Cucumis melo</i>        | Spain    | H.0                  | 10/10             | 5                    | 30%                     | 18                   | 15%                     |
| C-002                         | <i>Cucumis melo</i>        | Spain    | H.0                  | 6/10              | 8                    | 100%                    | >50                  | 0%                      |
| C-008                         | <i>Cucumis melo</i>        | Spain    | H.0                  | 10/10             | 2                    | 0%                      | 2                    | 0%                      |
| C-010                         | <i>Cucumis melo</i>        | Spain    | H.0                  | - <sup>g</sup>    | 8                    | 15%                     | >50                  | 0%                      |
| C-012                         | <i>Cucumis melo</i>        | Mexico   | H.2                  | 6/10              | 1                    | 0%                      | 1                    | 0%                      |
| C-019                         | <i>Cucumis melo</i>        | Spain    | H.0                  | 9/10              | 8                    | 0%                      | >50                  | 0%                      |
| C-025                         | <i>Cucumis melo</i>        | Portugal | H.0                  | 10/10             | 21                   | 0%                      | 9                    | 0%                      |
| C-029                         | <i>Cucumis melo</i>        | USA      | H.0                  | 11/19             | 3                    | 0%                      | 5                    | 0%                      |
| C-035                         | <i>Cucumis melo</i>        | Spain    | H.3                  | 7/10              | 10                   | 100%                    | 10                   | 100%                    |
| C-040                         | <i>Cucumis melo</i>        | Japan    | H.0                  | 10/10             | 20                   | 0%                      | 18                   | 0%                      |
| C-046                         | <i>Cucumis melo</i>        | USA      | H.4                  | 9/10              | 0                    | 0                       | 7                    | 30%                     |
| C-048                         | <i>Cucumis melo</i>        | Israel   | H.0                  | 10/10             | 7                    | 0%                      | 3                    | 0%                      |
| C-053                         | <i>Cucumis melo</i>        | Spain    | H.0                  | 9/10              | 6                    | 100%                    | 15                   | 100%                    |
| C-055                         | <i>Cucumis melo</i>        | Spain    | H.0                  | 10/10             | 7                    | 50%                     | 5                    | 0%                      |
| C-058                         | <i>Cucumis melo</i>        | Spain    | H.0                  | 10/10             | 4                    | 0%                      | 3                    | 0%                      |
| C-062                         | <i>Cucumis melo</i>        | Spain    | H.0                  | 10/10             | 7                    | 25%                     | 2                    | 0%                      |
| C-065                         | <i>Cucumis melo</i>        | Spain    | H.0                  | 10/10             | 4                    | 13%                     | 3                    | 0%                      |
| C-066                         | <i>Cucumis melo</i>        | Spain    | H.0                  | 10/10             | 12                   | 0%                      | 10                   | 0%                      |
| C-069                         | <i>Cucumis melo</i>        | Spain    | H.0                  | -                 | 6                    | 0%                      | >50                  | 0%                      |
| C-070                         | <i>Cucumis melo</i>        | Spain    | H.0                  | 10/10             | 2                    | 0%                      | 3                    | 0%                      |
| C-071                         | <i>Cucumis melo</i>        | Spain    | H.0                  | 10/10             | 3                    | 16%                     | 3                    | 0%                      |
| C-072                         | <i>Cucumis myriocarpus</i> | Unknown  | No amplification     | 8/10              | 3                    | 0%                      | 2                    | 0%                      |
| C-075                         | <i>Cucumis melo</i>        | Spain    | H.0                  | 10/10             | 3                    | 28%                     | 5                    | 14%                     |
| C-076                         | <i>Cucumis metuliferus</i> | Unknown  | No amplification     | 5/5               | 2                    | 0%                      | 17                   | 0%                      |
| C-078                         | <i>Cucumis melo</i>        | Spain    | H.0                  | 8/10              | 7                    | 0%                      | 8                    | 0%                      |
| C-087                         | <i>Cucumis melo</i>        | Unknown  | H.1                  | 7/10              | 3                    | 0%                      | 8                    | 0%                      |
| C-098                         | <i>Cucumis melo</i>        | Spain    | H.0                  | -                 | 6                    | 71%                     | >30                  | 0%                      |
| C-105                         | <i>Cucumis melo</i>        | Zimbabwe | H.5                  | 8/10              | >30                  | 85%                     | 25                   | 60%                     |
| C-110                         | <i>Cucumis melo</i>        | Spain    | H.2                  | 12/20             | 6                    | 43%                     | 15                   | 43%                     |
| C-117                         | <i>Cucumis melo</i>        | Zimbabwe | H.5                  | 9/10              | 6                    | 25%                     | 12                   | 0%                      |

| Accession number <sup>a</sup> | Species                  | Origin      | EcoTILLING haplotype | CVYV <sup>b</sup> | MNSV-Mα5             |                         | MNSV-264             |                         |
|-------------------------------|--------------------------|-------------|----------------------|-------------------|----------------------|-------------------------|----------------------|-------------------------|
|                               |                          |             |                      |                   | Les/cot <sup>c</sup> | Sys. Symp. <sup>d</sup> | Les/cot <sup>e</sup> | Sys. Symp. <sup>f</sup> |
| C-125                         | <i>Cucumis melo</i>      | Zimbabwe    | H.0                  | 9/10              | 4                    | 67%                     | 6                    | 0%                      |
| C-160                         | <i>Cucumis melo</i>      | Ex URSS     | H.0                  | 10/10             | 5                    | 71%                     | >50                  | 0%                      |
| C-163                         | <i>Cucumis melo</i>      | Ex URSS     | H.1                  | 10/10             | 20                   | 0%                      | 9                    | 0%                      |
| C-169                         | <i>Cucumis melo</i>      | Greece      | H.0                  | 10/10             | 9                    | 0%                      | 4                    | 0%                      |
| C-172                         | <i>Cucumis melo</i>      | Italy       | H.0                  | 8/8               | <1                   | 0%                      | 5                    | 0%                      |
| C-178                         | <i>Cucumis melo</i>      | USA         | H.4                  | 9/10              | 0                    | 0%                      | 3                    | 0%                      |
| C-182                         | <i>Cucumis melo</i>      | China       | H.1                  | 10/10             | 5                    | 0%                      | 6                    | 0%                      |
| C-187                         | <i>Cucumis melo</i>      | Germany     | H.0                  | 10/10             | 10                   | 14%                     | 6                    | 0%                      |
| c-192                         | <i>Cucumis melo</i>      | India       | H.0                  | 9/10              | 6                    | 14%                     | 5                    | 0%                      |
| C-194                         | <i>Cucumis melo</i>      | Ex URSS     | H.0                  | 9/10              | 6                    | 0%                      | 5                    | 0%                      |
| C-200                         | <i>Cucumis melo</i>      | Mexico      | H.0                  | 10/10             | 10                   | 0%                      | 10                   | 0%                      |
| C-204                         | <i>Cucumis melo</i>      | Libya       | H.3                  | 10/10             | 3                    | 0%                      | 3                    | 11%                     |
| C-205                         | <i>Cucumis africanus</i> | Unknown     | H.3                  | 0/10              | <1                   | 0%                      | <1                   | 0%                      |
| C-219                         | <i>Cucumis melo</i>      | Spain       | Not tested           | 10/10             | 10                   | 50%                     | 18                   | 0%                      |
| C-225                         | <i>Cucumis melo</i>      | Spain       | H.0                  | 10/10             | 1                    | 15%                     | 3                    | 0%                      |
| C-229                         | <i>Cucumis melo</i>      | Spain       | H.0                  | 9/10              | 5                    | 0%                      | 5                    | 0%                      |
| C-233                         | <i>Cucumis melo</i>      | Spain       | H.0                  | 10/10             | 3                    | 15%                     | 2                    | 0%                      |
| C-235                         | <i>Cucumis melo</i>      | Spain       | H.0                  | 10/10             | 5                    | 17%                     | 3                    | 0%                      |
| C-241                         | <i>Cucumis melo</i>      | Spain       | H.0                  | 10/10             | 5                    | 57%                     | 5                    | 20%                     |
| C-243                         | <i>Cucumis melo</i>      | Spain       | H.0                  | 10/10             | 9                    | 16%                     | 8                    | 16%                     |
| C-245                         | <i>Cucumis melo</i>      | Spain       | H.0                  | 10/10             | 7                    | 15%                     | 6                    | 0%                      |
| C-247                         | <i>Cucumis melo</i>      | Libya       | H.0                  | 10/10             | 3                    | 0%                      | 2                    | 0%                      |
| C-250                         | <i>Cucumis melo</i>      | Spain       | H.0                  | 10/10             | 15                   | 43%                     | 8                    | 0%                      |
| C-262                         | <i>Cucumis melo</i>      | Libya       | H.2                  | 10/10             | 6                    | 57%                     | 5                    | 29%                     |
| C-269                         | <i>Cucumis melo</i>      | China       | H.0                  | 10/10             | 6                    | 0%                      | 6                    | 0%                      |
| C-271                         | <i>Cucumis melo</i>      | Spain       | H.0                  | -                 | 9                    | 28%                     | >50                  | 50%                     |
| C-273                         | <i>Cucumis melo</i>      | USA         | Not tested           | 10/10             | 8                    | 0%                      | >50                  | 0%                      |
| C-277                         | <i>Cucumis zeyheri</i>   | Unknown     | No amplification     | 0/10              | 0                    | 0%                      | 0                    | 0%                      |
| C-278                         | <i>Cucumis melo</i>      | Spain       | H.0                  | -                 | 6                    | 83%                     | 8                    | 43%                     |
| C-300                         | <i>Cucumis melo</i>      | Spain       | H.0                  | 7/10              | 2                    | 15%                     | 3                    | 0%                      |
| C-305                         | <i>Cucumis melo</i>      | Spain       | H.0                  | -                 | 5                    | 43%                     | >50                  | 0%                      |
| C-308                         | <i>Cucumis melo</i>      | Spain       | H.0                  | -                 | 8                    | 40%                     | 8                    | 0%                      |
| C-311                         | <i>Cucumis melo</i>      | Beluchistan | H.0                  | 10/10             | >50                  | 67%                     | 6                    | 0%                      |

| Accession number <sup>a</sup> | Species                    | Origin        | EcoTILLING haplotype | CVYV <sup>b</sup> | MNSV-Mα5             |                         | MNSV-264             |                         |
|-------------------------------|----------------------------|---------------|----------------------|-------------------|----------------------|-------------------------|----------------------|-------------------------|
|                               |                            |               |                      |                   | Les/cot <sup>c</sup> | Sys. Symp. <sup>d</sup> | Les/cot <sup>e</sup> | Sys. Symp. <sup>f</sup> |
| C-317                         | <i>Cucumis melo</i>        | Spain         | H.0                  | -                 | 5                    | 0%                      | 50                   | 0%                      |
| C-319                         | <i>Cucumis melo</i>        | Spain         | H.0                  | -                 | 15                   | 100%                    | 50                   | 100%                    |
| C-323                         | <i>Cucumis melo</i>        | Spain         | H.0                  | -                 | 7                    | 15%                     | 50                   | 0%                      |
| C-326                         | <i>Cucumis melo</i>        | Spain         | H.0                  | -                 | 4                    | 43%                     | >30                  | 0%                      |
| C-330                         | <i>Cucumis melo</i>        | Spain         | H.0                  | -                 | 14                   | 100%                    | >50                  | 86%                     |
| C-333                         | <i>Cucumis melo</i>        | Spain         | H.0                  | -                 | 4                    | 100%                    | 8                    | 28%                     |
| C-340                         | <i>Cucumis melo</i>        | Beluchistan   | H.0                  | -                 | >50                  | 33%                     | >50                  | 10%                     |
| C-343                         | <i>Cucumis melo</i>        | Spain         | H.0                  | -                 | 2                    | 33%                     | 4                    | 43%                     |
| C-344                         | <i>Cucumis melo</i>        | Spain         | H.0                  | -                 | 10                   | 72%                     | 25                   | 0%                      |
| C-352                         | <i>Cucumis melo</i>        | Spain         | H.0                  | -                 | 5                    | 14%                     | >50                  | 0%                      |
| C-406                         | <i>Cucumis melo</i>        | Spain         | H.0                  | 10/10             | 8                    | 29%                     | 6                    | 0%                      |
| C-409                         | <i>Cucumis melo</i>        | Spain         | H.0                  | 10/10             | 7                    | 0%                      | 5                    | 0%                      |
| C-411                         | <i>Cucumis melo</i>        | Spain         | H.0                  | 10/10             | 8                    | 15%                     | 10                   | 15%                     |
| C-412                         | <i>Cucumis melo</i>        | Spain         | H.0                  | 10/10             | 5                    | 28%                     | 2                    | 0%                      |
| C-426                         | <i>Cucumis melo</i>        | Spain         | H.0                  | -                 | 12                   | 15%                     | 7                    | 0%                      |
| C-447                         | <i>Cucumis melo</i>        | USA           | H.0                  | 10/10             | 15                   | 43%                     | 12                   | 15%                     |
| C-451                         | <i>Cucumis melo</i>        | Ex Yugoslavia | H.0                  | 9/10              | >50                  | 17%                     | 23                   | 0%                      |
| C-457                         | <i>Cucumis melo</i>        | Ex Yugoslavia | H.0                  | -                 | 19                   | 57%                     | >50                  | 14%                     |
| C-488                         | <i>Cucumis melo</i>        | Spain         | H.0                  | 9/10              | >50                  | 15%                     | 3                    | 13%                     |
| C-489                         | <i>Cucumis melo</i>        | Spain         | H.0                  | 10/10             | 2                    | 15%                     | 4                    | 0%                      |
| C-492                         | <i>Cucumis melo</i>        | Spain         | H.3                  | 10/10             | 7                    | 20%                     | >50                  | 20%                     |
| C-498                         | <i>Cucumis melo</i>        | Spain         | H.0                  | 10/10             | 5                    | 50%                     | 6                    | 0%                      |
| C-512                         | <i>Cucumis melo</i>        | Spain         | H.4                  | 10/10             | 0                    | 0%                      | 3                    | 15%                     |
| C-523                         | <i>Cucumis melo</i>        | Spain         | H.0                  | 10/10             | 8                    | 0%                      | 7                    | 0%                      |
| C-538                         | <i>Cucumis melo</i>        | Spain         | H.0                  | 8/10              | 9                    | 0%                      | 10                   | 0%                      |
| C-590                         | <i>Cucumis dipsaceus</i>   | Unknown       | No amplification     | 0/10              | 0                    | 0%                      | <1                   | 0%                      |
| C-629                         | <i>Cucumis melo</i>        | Italy         | H.0                  | 8/10              | >50                  | 20%                     | 10                   | 20%                     |
| C-630                         | <i>Cucumis africanus</i>   | Unknown       | No amplification     | 0/9               | <1                   | 0%                      | <1                   | 0%                      |
| C-633                         | <i>Cucumis prophetarum</i> | Unknown       | Not tested           | 0/10              | <1                   | 15%                     | <1                   | 0%                      |
| C-635                         | <i>Cucumis meeusii</i>     | Unknown       | No amplification     | 10/10             | 0                    | 0%                      | <1                   | 0%                      |
| C-636                         | <i>Cucumis anguria</i>     | Unknown       | No amplification     | 10/10             | 0                    | 0%                      | <1                   | 0%                      |
| C-637                         | <i>Cucumis ficifolius</i>  | Unknown       | No amplification     | 7/10              | <1                   | 15%                     | <1                   | 0%                      |
| C-641                         | <i>Cucumis melo</i>        | Zambia        | H.0                  | 8/10              | 3                    | 0%                      | 2                    | 0%                      |

| Accession number <sup>a</sup> | Species             | Origin        | EcoTILLING haplotype | CVYV <sup>b</sup> | MNSV-Mα5             |                         | MNSV-264             |                         |
|-------------------------------|---------------------|---------------|----------------------|-------------------|----------------------|-------------------------|----------------------|-------------------------|
|                               |                     |               |                      |                   | Les/cot <sup>c</sup> | Sys. Symp. <sup>d</sup> | Les/cot <sup>e</sup> | Sys. Symp. <sup>f</sup> |
| C-646                         | <i>Cucumis melo</i> | Spain         | H.0                  | 10/10             | 9                    | 44%                     | 4                    | 0%                      |
| C-701                         | <i>Cucumis melo</i> | Pakistan      | H.0                  | 10/10             | 2                    | 15%                     | 4                    | 0%                      |
| C-707                         | <i>Cucumis melo</i> | Pakistan      | H.1                  | 10/10             | 7                    | 33%                     | 6                    | 15%                     |
| C-719                         | <i>Cucumis melo</i> | Ex Yugoslavia | H.0                  | 10/10             | 4                    | 17%                     | 2                    | 0%                      |
| C-726                         | <i>Cucumis melo</i> | Spain         | H.0                  | 10/10             | >50                  | 0%                      | 3                    | 0%                      |
| C-732                         | <i>Cucumis melo</i> | Unknown       | H.2                  | 9/10              | 2                    | 0%                      | 2                    | 0%                      |
| C-747                         | <i>Cucumis melo</i> | Ex Yugoslavia | H.0                  | 9/10              | <1                   | 0%                      | <1                   | 0%                      |
| C-753                         | <i>Cucumis sp.</i>  | Unknown       | H.0                  | 9/10              | <1                   | 15%                     | <1                   | 15%                     |
| C-755                         | <i>Cucumis sp.</i>  | Unknown       | H.0                  | 7/10              | <1                   | 0%                      | <1                   | 0%                      |
| C-756                         | <i>Cucumis melo</i> | Spain         | H.0                  | -                 | 11                   | 71%                     | >50                  | 0%                      |
| C-757                         | <i>Cucumis melo</i> | Spain         | H.0                  | -                 | >50                  | 100%                    | >50                  | 100%                    |
| C-758                         | <i>Cucumis melo</i> | Spain         | H.0                  | 9/10              | >50                  | 33%                     | <1                   | 0%                      |
| C-759                         | <i>Cucumis melo</i> | Spain         | H.5                  | 9/10              | 6                    | 0%                      | 3                    | 0%                      |
| C-761                         | <i>Cucumis melo</i> | Spain         | H.0                  | 10/10             | 3                    | 33%                     | 10                   | 0%                      |
| C-762                         | <i>Cucumis melo</i> | Spain         | Not tested           | 10/10             | 10                   | 28%                     | 6                    | 0%                      |
| C-763                         | <i>Cucumis melo</i> | Spain         | H.0                  | 10/10             | 6                    | 15%                     | 1                    | 0%                      |
| C-765                         | <i>Cucumis melo</i> | Spain         | H.0                  | 10/10             | 8                    | 15%                     | 2                    | 0%                      |
| C-766                         | <i>Cucumis melo</i> | Spain         | H.0                  | 10/10             | 5                    | 0%                      | 3                    | 0%                      |
| C-767                         | <i>Cucumis melo</i> | Spain         | H.0                  | 9/10              | 5                    | 28%                     | 5                    | 0%                      |
| C-826                         | <i>Cucumis melo</i> | Spain         | H.0                  | 9/10              | 6                    | 12%                     | 3                    | 0%                      |
| C-827                         | <i>Cucumis melo</i> | Spain         | H.0                  | -                 | 7                    | 15%                     | 10                   | 0%                      |
| C-828                         | <i>Cucumis melo</i> | Spain         | H.0                  | -                 | 3                    | 0%                      | 5                    | 0%                      |
| C-829                         | <i>Cucumis melo</i> | Spain         | H.0                  | -                 | 12                   | 100%                    | >50                  | 0%                      |
| C-830                         | <i>Cucumis melo</i> | Spain         | H.0                  | -                 | 9                    | 100%                    | >50                  | 0%                      |
| C-831                         | <i>Cucumis melo</i> | Spain         | H.0                  | -                 | 15                   | 43%                     | 5                    | 0%                      |
| C-832                         | <i>Cucumis melo</i> | Spain         | H.0                  | -                 | 15                   | 13%                     | >50                  | 0%                      |
| C-834                         | <i>Cucumis melo</i> | Spain         | H.0                  | 9/10              | 10                   | 0%                      | 8                    | 0%                      |
| C-837                         | <i>Cucumis melo</i> | Israel        | H.0                  | 8/10              | 5                    | 0%                      | 7                    | 0%                      |
| C-839                         | <i>Cucumis melo</i> | Israel        | H.0                  | 9/10              | 6                    | 25%                     | 4                    | 0%                      |
| C-840                         | <i>Cucumis melo</i> | Rusia         | H.1                  | 9/10              | 7                    | 28%                     | 5                    | 0%                      |
| C-841                         | <i>Cucumis melo</i> | Israel        | H.1                  | 10/10             | 5                    | 57%                     | 3                    | 0%                      |
| C-842                         | <i>Cucumis melo</i> | Israel        | H.1                  | 9/10              | 7                    | 71%                     | 5                    | 15%                     |
| C-843                         | <i>Cucumis melo</i> | Ukraine       | Not tested           | 10/10             | 4                    | 25%                     | 3                    | 13%                     |

| Accession number <sup>a</sup> | Species             | Origin       | EcoTILLING haplotype | CVYV <sup>b</sup> | MNSV-Mα5             |                         | MNSV-264             |                         |
|-------------------------------|---------------------|--------------|----------------------|-------------------|----------------------|-------------------------|----------------------|-------------------------|
|                               |                     |              |                      |                   | Les/cot <sup>c</sup> | Sys. Symp. <sup>d</sup> | Les/cot <sup>e</sup> | Sys. Symp. <sup>f</sup> |
| <b>C-844</b>                  | <i>Cucumis melo</i> | Turkey       | H.0                  | 10/10             | 3                    | 28%                     | 4                    | 15%                     |
| <b>C-861</b>                  | <i>Cucumis melo</i> | Germany      | Not tested           | 9/10              | 1                    | 0%                      | 3                    | 0%                      |
| <b>C-862</b>                  | <i>Cucumis melo</i> | Greece       | Not tested           | 10/10             | 4                    | 33%                     | 2                    | 33%                     |
| <b>C-863</b>                  | <i>Cucumis melo</i> | Germany      | Not tested           | 10/10             | 4                    | 25%                     | 4                    | 0%                      |
| <b>C-864</b>                  | <i>Cucumis melo</i> | Russia       | Not tested           | 10/10             | <1                   | 20%                     | <1                   | 0%                      |
| <b>C-865</b>                  | <i>Cucumis melo</i> | Georgia      | Not tested           | 10/10             | <1                   | 17%                     | <1                   | 0%                      |
| <b>C-866</b>                  | <i>Cucumis melo</i> | Germany      | Not tested           | 10/10             | <1                   | 17%                     | 6                    | 0%                      |
| <b>C-868</b>                  | <i>Cucumis melo</i> | Ex URSS      | Not tested           | 10/10             | 4                    | 0%                      | <1                   | 0%                      |
| <b>C-869</b>                  | <i>Cucumis melo</i> | Mongolia     | Not tested           | 10/10             | 2                    | 21%                     | 9                    | 0%                      |
| <b>C-870</b>                  | <i>Cucumis melo</i> | Italy        | Not tested           | 10/10             | 12                   | 28%                     | 7                    | 0%                      |
| <b>C-872</b>                  | <i>Cucumis melo</i> | Tadshikistan | Not tested           | 10/10             | <1                   | 75%                     | 3                    | 0%                      |
| <b>C-874</b>                  | <i>Cucumis melo</i> | Mongolia     | Not tested           | 8/10              | 8                    | 25%                     | 2                    | 0%                      |
| <b>C-875</b>                  | <i>Cucumis melo</i> | Irak         | Not tested           | 10/10             | 90                   | 57%                     | >50                  | 57%                     |
| <b>C-878</b>                  | <i>Cucumis melo</i> | Italy        | Not tested           | 5/10              | 2                    | 100%                    | 2                    | 12%                     |
| <b>C-880</b>                  | <i>Cucumis melo</i> | Georgia      | Not tested           | 10/10             | 5                    | 0%                      | 3                    | 0%                      |
| <b>C-881</b>                  | <i>Cucumis melo</i> | Georgia      | Not tested           | 10/10             | 15                   | 15%                     | >50                  | 28%                     |
| <b>C-883</b>                  | <i>Cucumis melo</i> | Canadá       | Not tested           | 10/10             | 5                    | 0%                      | 10                   | 8%                      |
| <b>C-887</b>                  | <i>Cucumis melo</i> | Albania      | Not tested           | 9/10              | 6                    | 28%                     | 20                   | 40%                     |
| <b>C-889</b>                  | <i>Cucumis melo</i> | Italy        | Not tested           | 10/10             | >50                  | 57%                     | >50                  | 15%                     |
| <b>C-921</b>                  | <i>Cucumis melo</i> | Spain        | H.0                  | 10/10             | 8                    | 16%                     | 2                    | 0%                      |
| <b>WMR-29</b>                 | <i>Cucumis melo</i> | -            | H.3                  | 10/10             | -                    | -                       | -                    | -                       |

<sup>a</sup>Accession numbers of germplasm collection of Estación Experimental “La Mayora”- CSIC (Málaga, Spain).

<sup>b</sup>Number of infected plants/ number of inoculated plants with CVYV at 15 dpi.

<sup>c</sup>Average number of local lesions / cotyledon after MNSV-Mα5 inoculation.

<sup>d</sup>Percentage of plants showing systemic symptoms with MNSV-Mα5 at 5 dpi.

<sup>e</sup>Average number of local lesions / cotyledon after MNSV-264 inoculation.

<sup>f</sup>Percentage of plants showing systemic symptoms with MNSV-264 at 5 dpi.

<sup>g</sup>A dash (-) indicates that no data is available for this particular accession or observation.
